# Supplementary material for: Docking Applied to the Prediction of the Affinity of Compounds to P-Glycoprotein
Source: Biomed Res Int. 2014 May 27;2014:358425. doi: 10.1155/2014/358425 (PMC4058261; doi:10.1155/2014/358425)
Supplement: Supplementary file 1 — The Supplementary Material includes Ramachandran plots of the human model of the P-glycoprotein. It also includes a figure of the superimposition of the predicted and the crystal structure of mouse P-gp, a table with the full dataset of binders and non-binders analyzed and the contribution of the ligand internal energy to the final docking score. [file 358425.f1.zip › Supporting Information/FigureA1.pdf]

# Ramachandran Plot

pgp\_human-itasser\_noHs (1 models)

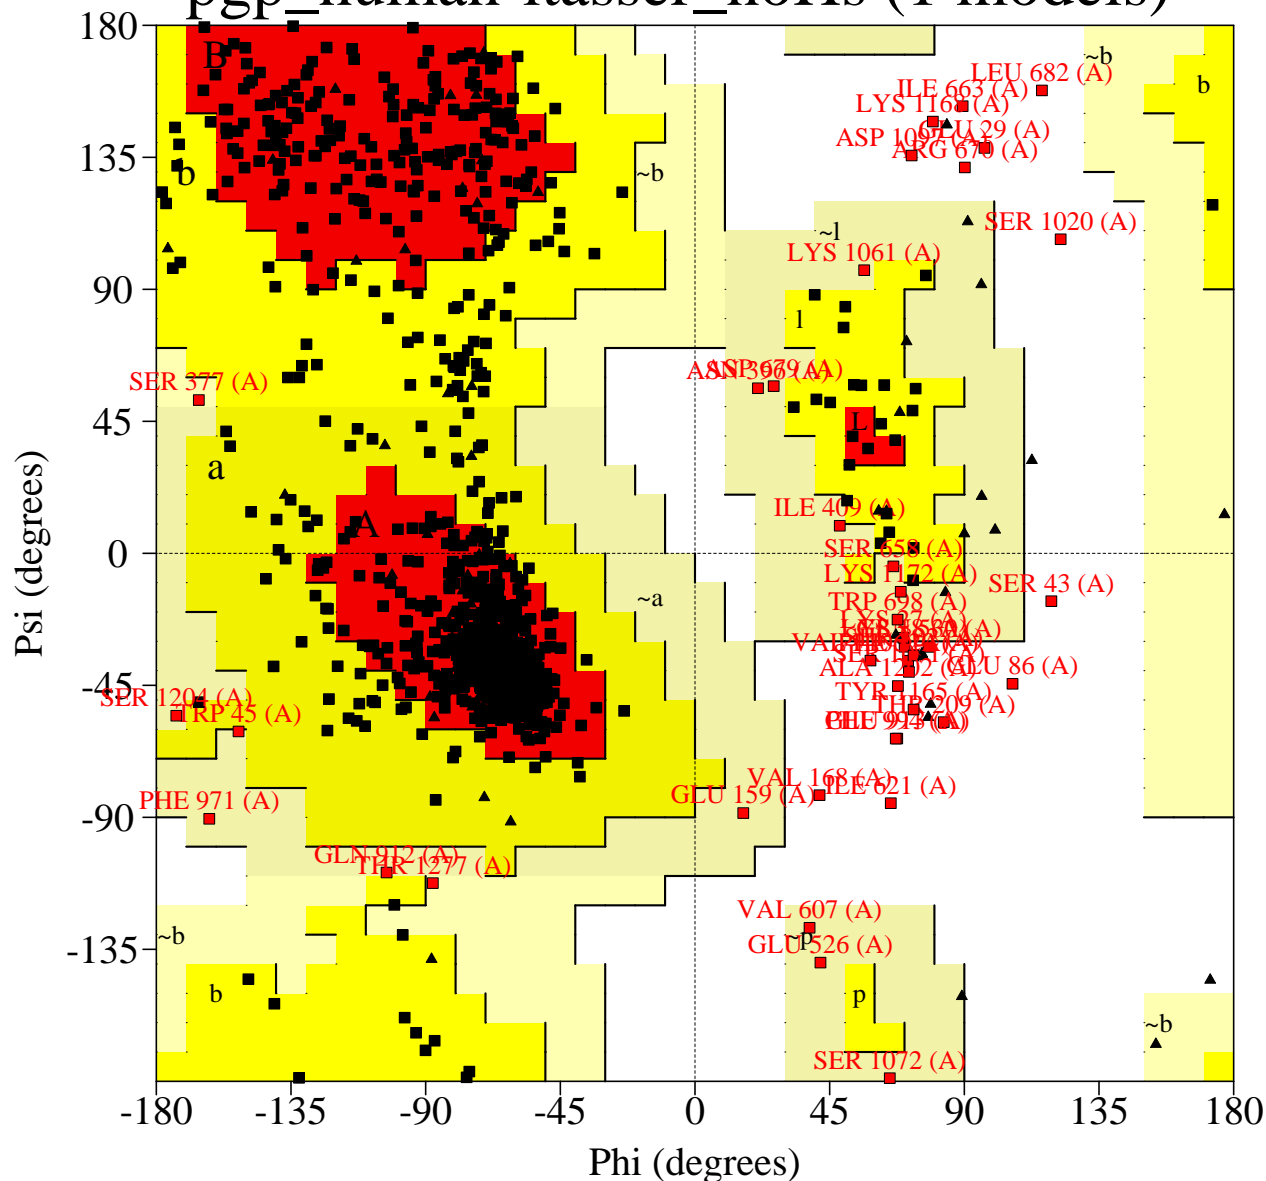

## Plot statistics

|                                                      |      |        |
|------------------------------------------------------|------|--------|
| Residues in most favoured regions [A,B,L]            | 895  | 81.5%  |
| Residues in additional allowed regions [a,b,l,p]     | 163  | 14.8%  |
| Residues in generously allowed regions [~a,~b,~l,~p] | 18   | 1.6%   |
| Residues in disallowed regions                       | 22   | 2.0%   |
| -----                                                |      |        |
| Number of non-glycine and non-proline residues       | 1098 | 100.0% |
| Number of end-residues (excl. Gly and Pro)           | 35   |        |
| Number of glycine residues (shown as triangles)      | 99   |        |
| Number of proline residues                           | 29   |        |
| -----                                                |      |        |
| Total number of residues                             | 1261 |        |

Based on an analysis of 118 structures of resolution of at least 2.0 Angstroms and R-factor no greater than 20%, a good quality model would be expected to have over 90% in the most favoured regions.
