# Supplementary material for: Docking Applied to the Prediction of the Affinity of Compounds to P-Glycoprotein
Source: Biomed Res Int. 2014 May 27;2014:358425. doi: 10.1155/2014/358425 (PMC4058261; doi:10.1155/2014/358425)
Supplement: Supplementary file 1 — The Supplementary Material includes Ramachandran plots of the human model of the P-glycoprotein. It also includes a figure of the superimposition of the predicted and the crystal structure of mouse P-gp, a table with the full dataset of binders and non-binders analyzed and the contribution of the ligand internal energy to the final docking score. [file 358425.f1.zip › Supporting Information/Table A1.ods]

## Sheet: Sheet1
compound	P-GP	Monolayers efflux							ATPase							Calcein-AM								Rhodamine – 123							Test	Clasification
	Cell line	Caco2	MDCK	LLC	BMEC	BREC	pBCECs	OS2.4/Doxo	Caco2	MDCK	LLC	BMEC	BREC	Daoy/daoyar2	MDR1-Sf9	Caco2	MDCK	LLC	BMEC	BREC	pBCECs	Daoy/daoyar2	OS2.4/Doxo	Caco2	MDCK	LLC	BMEC	BREC	Daoy/daoyar2	OS2.4/Doxo	In vivo
Amantadine	P-gp Human		N(2)N(3)												N(3)		N(2)N(3)															Non-substrate
	P-gp mouse
	P-gp other
	P-gp other
Carbamazepine	P-gp Human	N(5)	N(2)N(4)N(5)	N(5)		N(5)				N(4)							N(2)N(4)															Non-substrate
	P-gp mouse		N(4)
	P-gp dog																													N(5)
Chlorpheniramine	P-gp Human		N(2)N(3)												N(3)		N(2)N(3)															Non-substrate
	P-gp mouse
	P-gp other
	P-gp other
Ethosuximide	P-gp Human	N(5)	N(4)N(5)	N(5)											N(4)		N(4)															Non-substrate
	P-gp mouse		N(4)
	P-gp other
	P-gp other
Felbamate	P-gp Human																															Non-substrate
	P-gp mouse
	P-gp other																													N(5)
	P-gp other
Fluoxetine	P-gp Human		N(2)N(4)												N(4)		P(2)P(4)															Discardeded
	P-gp mouse		N(4)
	P-gp other
	P-gp other
Fluvoxamine	P-gp Human		N(2)N(4)							N(4)							P(2)N(4)															Discardeded
	P-gp mouse		N(4)
	P-gp other
	P-gp other
Gabapentin	P-gp Human	N(5)		N(5)																										P(5)		Non-substrate
	P-gp mouse
	P-gp other
	P-gp other
Lidocaine	P-gp Human		N(2)N(3)												N(3)		N(2)N(3)															Non-substrate
	P-gp mouse
	P-gp other
	P-gp other
Mannitol	P-gp Human		N(2)N(3)												N(3)		N(2)N(3)															Non-substrate
	P-gp mouse
	P-gp other
	P-gp other
Propranolol	P-gp Human		N(2)N(3)												N(3)		N(2)N(3)															Non-substrate
	P-gp mouse
	P-gp other
	P-gp other
Ranitidine	P-gp Human		N(3)								N(1)				N(3)		N(3)	N(1)						N(1)								Non-substrate
	P-gp mouse																	N(1)
	P-gp porcine																				N(1)
	P-gp other
Selegiline	P-gp Human		N(2)N(4)												N(4)		N(2)N(4)															Non-substrate
	P-gp mouse		N(4)
	P-gp other
	P-gp other
Sumatriptan	P-gp Human		N(2)N(3)												N(3)		N(2)N(3)															Non-substrate
	P-gp mouse
	P-gp other
	P-gp other
Topiramate	P-gp Human	N(5)																														Non-substrate
	P-gp mouse
	P-gp dog																													N(5)
	P-gp other
Trazodone	P-gp Human		N(2)N(4)												N(4)		P(2)N(4)															Discardeded
	P-gp mouse		N(4)
	P-gp other
	P-gp other
Valproato de Na	P-gp Human		N(5)	P(5)																												Discardeded
	P-gp mouse
	P-gp other
	P-gp other
Vigabatrin	P-gp Human	N(5)																														Non-substrate
	P-gp mouse
	P-gp other
	P-gp other
Zonisamide	P-gp Human																															Non-substrate
	P-gp mouse
	P-gp dog																													N(5)
	P-gp other
Acetazolamide	P-gp Human	P(5)																														Discardeded
	P-gp mouse
	P-gp other
	P-gp other
Amprenavir	P-gp Human		P(3)P(2)												P(3)		P(3)P(2)															substrate
	P-gp mouse
	P-gp other
	P-gp other
Astemizole	P-gp Human		P(2)								P(1)						P(2)	P(1)						P(1)								substrate
	P-gp mouse																	P(1)
	P-gp porcine																				P(1)
	P-gp other
Buspirone	P-gp Human		N(2)N(4)												N(4)		P(2)P(4)															Discardeded
	P-gp mouse		N(4)
	P-gp other
	P-gp other
Carbamazepine-10,11-epoxide	P-gp Human		P(5)	P(5)																												substrate
	P-gp mouse
	P-gp other
	P-gp other
Colchicine	P-gp Human		P(3)	P(1:+)							N(1)				N(3)		N(3)	N(1)						N(1)								Discardeded
	P-gp mouse																	N(1)
	P-gp mouse																				N(1)
	P-gp other
Cyclosporin A	P-gp Human		P(3)								P(1)				N(3)		P(3)	P(1)						P(1)								substrate
	P-gp mouse																	P(1)
	P-gp porcine																				P(1)
	P-gp other
Dexamethasone	P-gp Human		P(3)	P(1)							P(1)				N(3)		N(3)	N(1)						N(1)								Discardeded
	P-gp mouse																	N(1)
	P-gp other																				N(1)
	P-gp other
Diltiazem	P-gp Human		P(3)P(2)												P(3)		P(3)P(2)															substrate
	P-gp mouse
	P-gp other
	P-gp other
Eslicarbazepine acetate	P-gp Human		P(5)	P(5)																												substrate
	P-gp mouse
	P-gp other
	P-gp other
Etoposide	P-gp Human		P(3)								N(1)				N(3)		N(3)	N(1)						N(1)								Discardeded
	P-gp mouse																	N(1)
	P-gp porcine																				N(1)
	P-gp other
Haloperidol	P-gp Human		N(2)N(4)							N(4)							P(2)P(4)															Discardeded
	P-gp mouse		N(4)
	P-gp other
	P-gp other
Indinavir	P-gp Human		P(2)P(3)												P(3)		N(2)N(3)															substrate
	P-gp mouse
	P-gp other
	P-gp other
Ketoconazole	P-gp Human		N(3)								P(1)				P(3)		P(3)	P(1)						P(1)								substrate
316	P-gp mouse																	P(1)
	P-gp other																				P(1)
	P-gp other
Lamotrigine	P-gp Human	N(5)	N(4)	P(5)											N(4)		N(4)														P(5)	substrate
	P-gp mouse		N(4)
	P-gp dog																													P(5)	P(5)
	P-gp other
Levetiracetam	P-gp Human		N(5)	P(5)																												substrate
	P-gp mouse
	P-gp dog																													P(5)
	P-gp other
Loperamide	P-gp Human		P(3)P(2)P(4)												P(3)P(4)		P(3)P(2)P(4)															substrate
	P-gp mouse		P(4)
	P-gp other
	P-gp other
Loratadine	P-gp Human		P(3)N(4)												P(3)P(4)		P(3)P(4)															substrate
	P-gp mouse		N(4)
	P-gp other
	P-gp other
Nelfinavir	P-gp Human		P(3)								P(1)				P(3)		P(3)	P(1)						P(1)								substrate
	P-gp mouse																	Pb(1)
	P-gp porcine																				P(1)
	P-gp other
Neostigmine	P-gp Human		P(2)P(3)												N(3)		N(2)N(3)															Discardeded
	P-gp mouse
	P-gp other
	P-gp other
Nicardipine	P-gp Human		N(3)								P(1)				P(3)		P(3)	P(1)						P(1)								substrate
	P-gp mouse																	P(1)
	P-gp porcine																				P(1)
	P-gp other
Oxcarbazepine	P-gp Human		P(5)	P(5)																											P(5)	substrate
	P-gp mouse
	P-gp other																														N(5)
	P-gp other
Phenobarbital	P-gp Human	N(5)	P(5)	P(5)																												substrate
	P-gp mouse
	P-gp dog																													P(5)
	P-gp rata				P(5)									P(5)																	P(5)
Phenytoin	P-gp Human	N(5)	N(4)P(5)	P(5)		N(5)	N(5)								N(4)		N(4)															Discarded
	P-gp mouse		N(4)
	P-gp dog																													N(5)	P(5)
	P-gp rata				P(5)
Prazosin	P-gp Human		P(3)P(4)												P(3)P(4)		P(3)N(4)															substrate
	P-gp mouse		P(4)
	P-gp other
	P-gp other
Quinidine	P-gp Human		P(3)P(4)												P(3)P(4)		P(3)P(4)															substrate
	P-gp mouse		P(4)
	P-gp other
	P-gp other
Risperidone	P-gp Human		P(2)P(4)												P(4)		P(2)N(4)															substrate
	P-gp mouse		P(4)
	P-gp other
	P-gp other
Ritonavir	P-gp Human		P(3)P(4)								P(1)				P(3)P(4)		P(3)N(4)	P(1)						P(1)								substrate
	P-gp mouse		P(4)															N(1)
	P-gp porcine																				P(1)
	P-gp other
Saquinavir	P-gp Human		P(3)	P(1):++							P(1)				P(3)		P(3)	P(1)						P(1)								substrate
	P-gp mouse																	N(1)
	P-gp porcine																				P(1)
	P-gp other
S-licarbazepine	P-gp Human		P(5)	P(5)																												substrate
	P-gp mouse
	P-gp other
	P-gp other
Terfenadine	P-gp Human		P(3)								N(1)				P(3)		P(3)	P(1)						N(1)								substrate
	P-gp mouse																	P(1)
	P-gp porcine																				P(1)
	P-gp other
Trimethoprim	P-gp Human		P(2)P(3)												P(3)		N(2)N(3)															substrate
	P-gp mouse
	P-gp other
	P-gp other
Verapamil	P-gp Human		N(3)P(4)	P(1+++)							P(1)				P(3)P(4)		P(3)P(4)	P(1)						P(1)								substrate
	P-gp mouse		N(4)															P(1)
	P-gp other																				P(1)
	P-gp other
Vinblastine	P-gp Human		P(3)								P(1)				P(3)		P(3)	N(1)						P(1)								substrate
	P-gp mouse																	P-a/N-b(1)
	P-gp porcine																				P(1)
	P-gp other
1. Schwab, D., Fischer, H., Tabatabaei, A., Poli, S. & Huwyler, J. Comparison of in vitro P-glycoprotein screening assays: recommendations for their use in drug discovery. Journal of medicinal chemistry 46, 1716-25 (2003).
﻿
2. Doan, K.M.M. et al. Passive permeability and P-glycoprotein-mediated efflux differentiate central nervous system (CNS) and non-CNS marketed drugs. Journal of Pharmacology and Experimental Therapeutics 303, 1029 (2002).
3. Polli, J. W., Wring, S. a, Humphreys, J. E., Huang, L., Morgan, J. B., Webster, L. O., and Serabjit-Singh, C. S. (2001) Rational use of in vitro P-glycoprotein assays in drug discovery., The Journal of pharmacology and experimental therapeutics 299, 620-8.
4. Feng, B., Mills, J., Davidson, R. & Mireles, R. In vitro P-glycoprotein assays to predict the in vivo interactions of P-glycoprotein with drugs in the central nervous system. Drug Metabolism and 36, 268-275 (2008).
﻿
5. Zhang, C., Kwan, P., Zuo, Z. & Baum, L. The transport of antiepileptic drugs by P-glycoprotein. Advanced drug delivery reviews (2011).doi:10.1016/j.addr.2011.12.003
